# Supplementary material
Source: PubMed Central journal article supplement (PMC4368061)
Supplement: CIN-Suppl.2-2015-045-s001.pdf [file CIN-Suppl.2-2015-045-s001.pdf]

Supplement 1: Details of 19 database tables in GeneMed

| Table Names         | Function                                                                      |
|---------------------|-------------------------------------------------------------------------------|
| Patient             | Stores patient IDs and basic clinical information                             |
| Sample              | Stores sample vcf file upload information                                     |
| Variant             | Stores variant information, along with annotation results from snpEff         |
| MOI                 | Stores aMOI information, with COSMIC ID attached                              |
| Homopolymer         | Stores homo polymer information                                               |
| GPD                 | Stores gene, pathway, drug information                                        |
| HGMD                | Stores HGMD mutation ID and links to PubMed                                   |
| SIFT                | Stores functional prediction results from SIFT run                            |
| Patient_seq_summary | Stores mutation summary information submitted by the treatment selection team |
| TreatmentAssignment | Stores patient treatment assignment information                               |
| Biopsy              | Stores patient biopsy sample information                                      |
| Prior_therapy       | Stores patient prior systemic therapy information                             |
| TreatmentReport     | Stores patient treatment report                                               |
| random_drug_abt     | Randomization table for drug ABT888                                           |
| random_drug_eve     | Randomization table for drug everolimus                                       |
| random_drug_gsk     | Randomization table for drug trametinib                                       |
| random_drug_mk      | Randomization table for drug MK-1775                                          |
| Mysql_log           | Stores information for database transaction records                           |
| mpactuser           | Stores user information and user group information                            |
